# Supplementary material for: TAOK2 rescues autism-linked developmental deficits in a 16p11.2 microdeletion mouse model
Source: PubMed Central journal article supplement (PMC9734055; doi:10.1038/s41380-022-01785-3), 2022-09-19

**a**

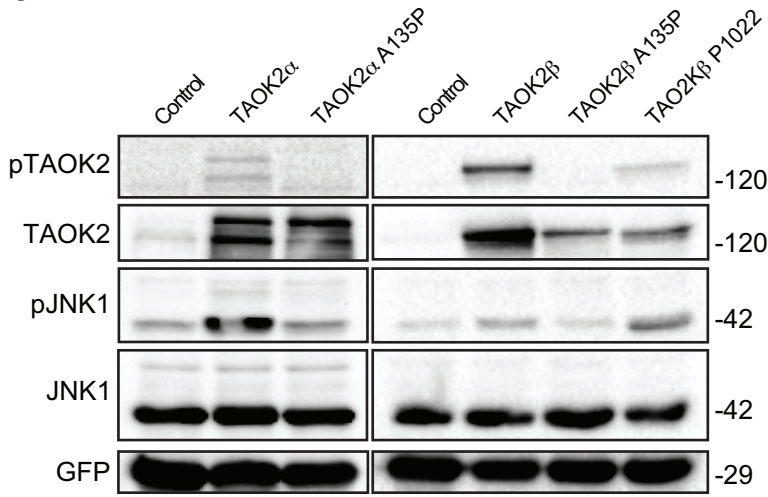

**b**

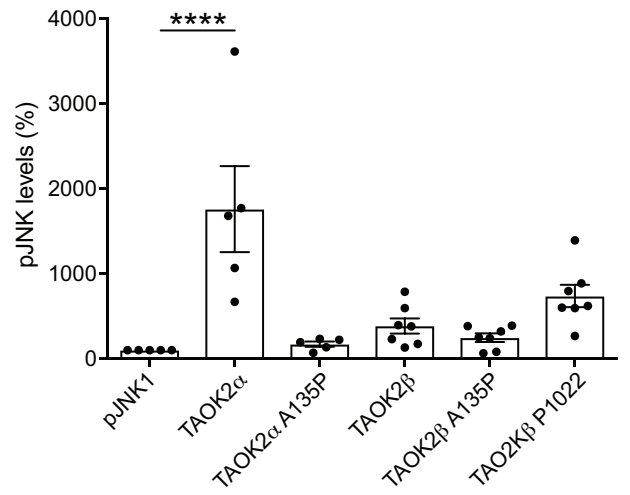

Supplement: 41380_2022_1785_MOESM11_ESM.pdf [file 41380_2022_1785_MOESM11_ESM.pdf]
